# Supplementary material for: Activation of a Ductal-to-Endocrine Transdifferentiation Transcriptional Program in the Pancreatic Cancer Cell Line PANC-1 Is Controlled by RAC1 and RAC1b through Antagonistic Regulation of Stemness Factors
Source: MDPI journal article supplement (doi:10.3390/cancers13215541), 2021-11-04
Supplement: s1 [file s1]

Figure S1

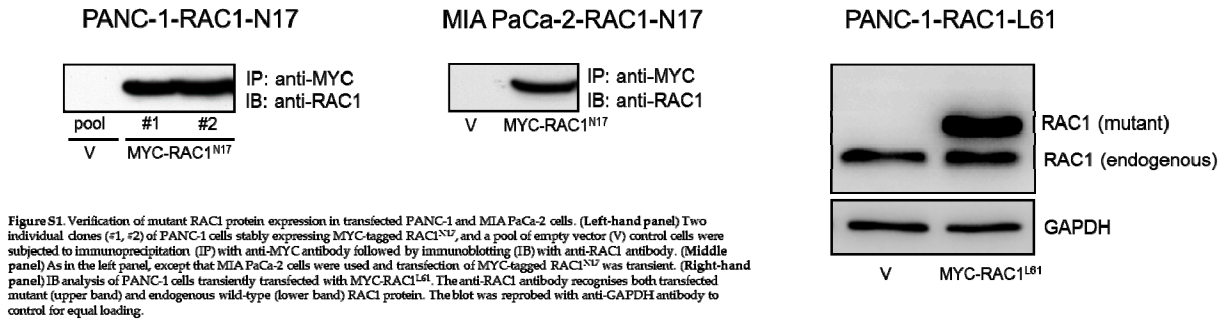

Figure S2

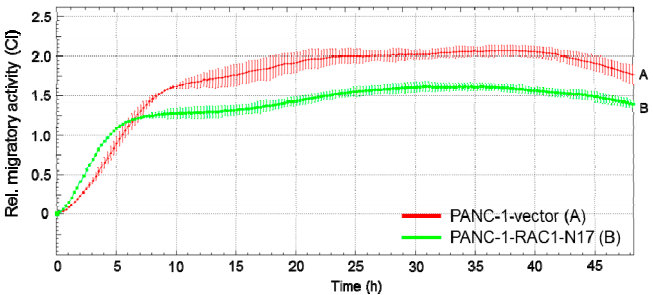

Figure S3

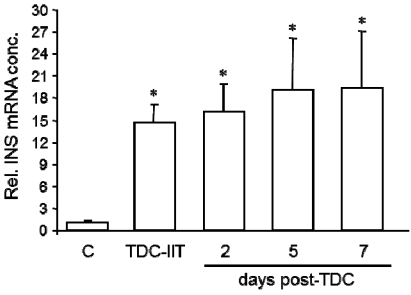

Figure S4

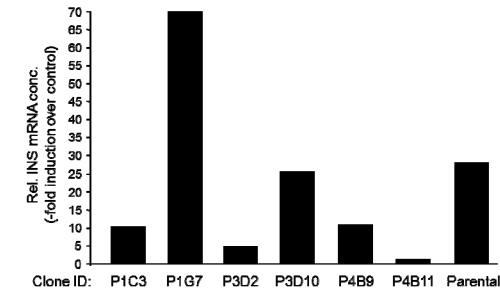

Figure S5

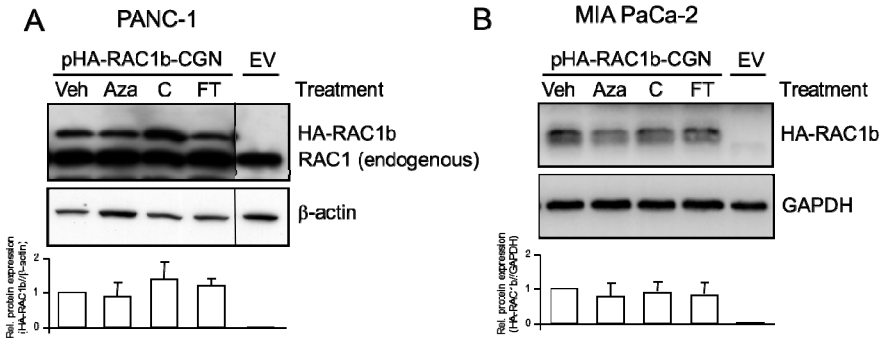

Figure S6

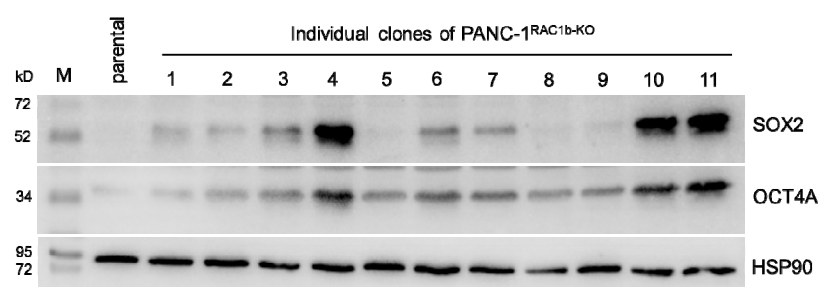

Figure S6. Immunoblot analysis of SOX2 and OCT4A expression in individual clones PANC-1<sup>RAC1b-KO</sup> cells. Eleven different individual (single cell-derived) clones of RAC1b-deficient PANC-1 cells (generated by limited dilution) and wild-type (parental) PANC-1 cells as control, were analysed by immunoblotting for SOX2 and OCT4A. Detection of HSP90 served to verify equal protein loading. Blots shown are representative of three experiments. M, molecular weight marker, kD, kDa Dalton.

Figure S7

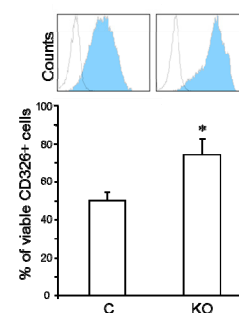

Figure S7. Expression of CD326/EpCAM in RAC1b-deficient PANC-1 cells. PANC1-1<sup>RAC1b-KO</sup> (KO) and control (C) cells were labeled with antibodies to CD326 or isotype control and measured by FACS. Data shown are representative of three independent experiments. Isotype control (white) and anti-CD326 antibody (blue).

Figure S8

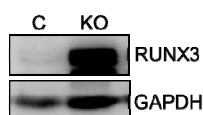

Figure S8. Immunoblot analysis of RUNX3 in PANC-1<sup>RAC1b-KO</sup> cells. PANC1<sup>RAC1b-KO</sup> (KO) and control (C) cells were subjected to immunoblot analysis and sequentially probed with antibodies to RUNX3, and GAPDH as a loading control. The blot shown is representative of three experiments.

Figure S9: Uncropped blots of Figure 4B

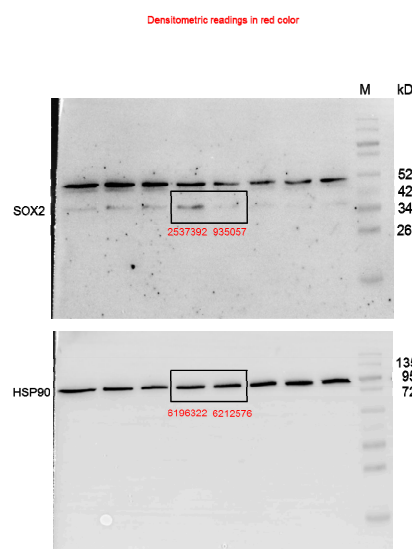

Figure legend: M = molecular weight marker (SM1841, Fermentas/Thermo Fisher Scientific)

Figure S10: Uncropped blots of Figure 4C

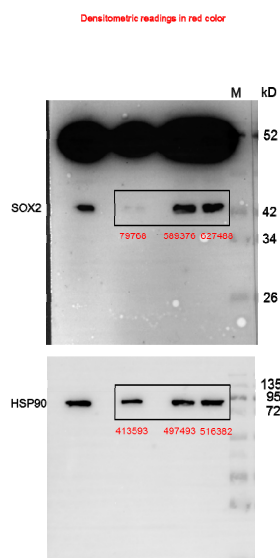

Figure legend: M = molecular weight marker (SM1841, Fermentas/Thermo Fisher Scientific)

Figure S11: Uncropped blots of Figure 5B

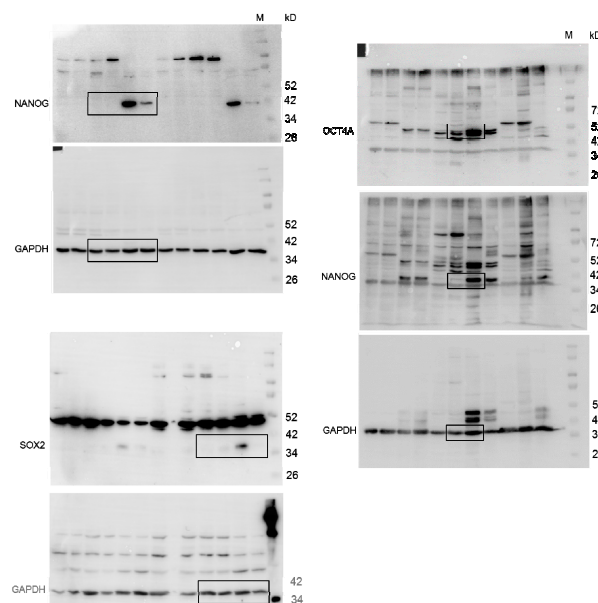

Figure legend: M = molecular weight marker (SM1841, Fermentas/Thermo Fisher Scientific)

Figure S12: Uncropped blots of Figure S1, right-hand panel

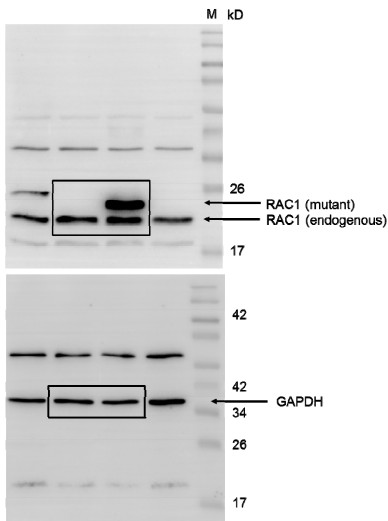

Figure legend: M = molecular weight marker (SM1841, Fermentas/Thermo Fisher Scientific)

Figure S13: Uncropped blots of Figure S2

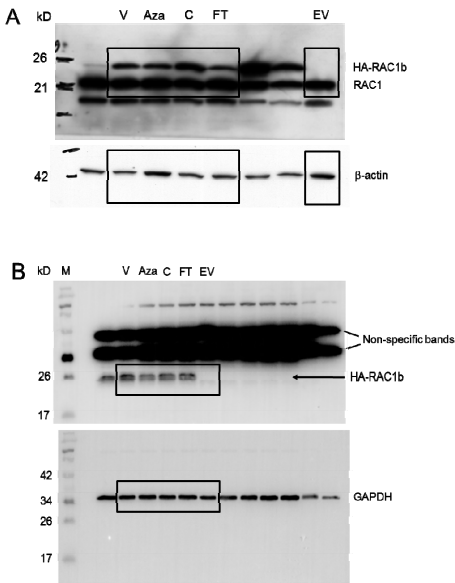

Figure legend: M = molecular weight marker (SM1841, Fermentas/Thermo Fisher Scientific)

Figure S14: Uncropped blots of Figure S6

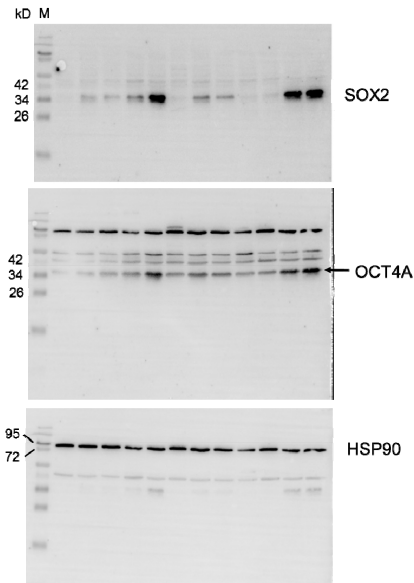

Figure legend: M = molecular weight marker (SM1841, Fermentas/Thermo Fisher Scientific)

Table S1. List of PCR primer sequences

| <b>Primer name</b> | <b>Sequence (5'→3')</b>   | <b>GenBank accession</b> |
|--------------------|---------------------------|--------------------------|
| INS-forward        | gcagcctttgtgaaccaacac     | NM_000207                |
| INS-reverse        | ccccgcacactaggtagaga      | NM_000207                |
| GAPDH-forward      | ttgcatcaatgacccctca       | NM_001357943             |
| GAPDH-reverse      | cgccacttgattttgga         | NM_001357943             |
| SLC2A2-forward     | ctgcattcagcaattggacctgc   | NM_000340                |
| SLC2A2-reverse     | tttacacagtctctgtagctcctag | NM_000340                |
| NEUROG3-forward    | ggcgtgactcaaacgctgc       | NM_020999                |
| NEUROG3-reverse    | aagccagactgcctgggctc      | NM_020999                |
| KLF4-forward       | gccaccacacttgtgatta       | NM_004235                |
| KLF4-reverse       | cgtcccagtcacagtggtaa      | NM_004235                |
| REX1-forward       | cagatcctaaacagctcgag      | NM_174900                |
| REX1-reverse       | cccgtgtggatgcgcacgt       | NM_174900                |
| MAFA-forward       | cgagctgaaccggcagctc       | NM_201589                |
| MAFA-reverse       | gccagttctcgtatttctccttg   | NM_201589                |
| NANOG-forward      | gatttgtgggctgaagaaaact    | NM_024865                |
| NANOG-reverse      | aggagagacagtctccgtgtgag   | NM_024865                |
| POUF5F1-forward    | ctctgaggtgtgggggattc      | NM_002701                |
| POUF5F1-reverse    | ttctggcgccgggttacagaacc   | NM_002701                |
| TBP-forward        | gctggcccatagtgatcttt      | NM_003194                |
| TBP-reverse        | cttcacacgccaagaaacag      | NM_003194                |
| SOX2-forward       | agtctccaagcgacgaaaaa      | NM_003106                |
| SOX2-reverse       | ggaaagtgggatcgaacaa       | NM_003106                |
